# Supplementary material for: An aerosol activation metamodel of v1.2.0 of the pyrcel cloud parcel model: development and offline assessment for use in an aerosol–climate model
Source: Copernicus journal article supplement (doi:10.5194/gmd-10-1817-2017), 2017-04-27
Supplement: Supplementary file 1 [file gmd-10-1817-2017-supplement.zip]

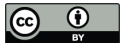

## *Supplement of*

# **An aerosol activation metamodel of v1.2.0 of the pyrcel cloud parcel model: development and offline assessment for use in an aerosol–climate model**

**Daniel Rothenberg and Chien Wang**

*Correspondence to:* Daniel Rothenberg (darothern@mit.edu)

- gmd-10-1817-2017-supplement-title-page.pdf
- marc\_pcm\_activation-master
  - .gitignore
  - Makefile
  - README.md
  - \_\_init\_\_.py
  - clean
  - dakota\_poly.py
  - dakota\_sample.py
  - dist\_tools.py
  - do\_plots.py
  - fortran
    - \* SM\_OLS\_4.ascii
    - \* pcm.nl
    - \* pcm\_param.f90
  - gen\_nc.py
  - gen\_scripts.py
  - pce\_2d\_sample.py
  - pce\_experiment.ipynb
  - pce\_experiment.py
  - pce\_sample.py
  - pce\_vis.py
  - pcm\_param.py
  - postprocess.ipynb

- proc\_sobol.py
- process\_output.py
- show\_exp.py
- templates
  - \* model\_pce.template
  - \* model\_pce\_parallel.template
  - \* model\_run\_linked.template
  - \* model\_run\_script.template

The copyright of individual parts of the supplement might differ from the CC-BY 3.0 licence.
